# Supplementary material for: Peroxido-bridged chiral double-decker dysprosium macrocycles
Source: Royal Society of Chemistry journal article supplement (doi:10.1039/d3dt01540h), 2023-01-01
Supplement: d3dt01540h1.pdf [file d3dt01540h1.pdf]

Supporting Information for

## Peroxi-bridged chiral double-decker dysprosium macrocycles

Chen Zhao,<sup>a,b,‡</sup> Tingting Wang,<sup>a,b,‡</sup> Xiaodong Liu,<sup>a,b</sup> Zhenhua Zhu,<sup>\*,a,c</sup> Xu Ying,<sup>a,b</sup> Xiao-Lei Li<sup>a</sup> and Jinkui Tang<sup>\*,a,b</sup>

<sup>a</sup>State Key Laboratory of Rare Earth Resource Utilization, Changchun Institute of Applied Chemistry, Chinese Academy of Sciences, Changchun, 130022, P. R. China

<sup>b</sup>School of Applied Chemistry and Engineering, University of Science and Technology of China, Hefei, 230026, P. R. China

<sup>c</sup>University of Chinese Academy of Sciences, Beijing, 100049, P. R. China

<sup>‡</sup>These authors contributed equally to this work.

<sup>\*</sup>Corresponding authors. Email: zhuzh@ciac.ac.cn; tang@ciac.ac.cn

### Contents

|                       |         |
|-----------------------|---------|
| X-ray crystallography | S2-S12  |
| Magnetic measurements | S12-S18 |
| References            | S19     |

## X-ray crystallography

**Table S1.** Crystal Data and Structure Refinement for **1** and **2**.

| Compound reference                                               | 1                                                                                               | 2                                                                                                   |
|------------------------------------------------------------------|-------------------------------------------------------------------------------------------------|-----------------------------------------------------------------------------------------------------|
| Chemical formula                                                 | C <sub>183</sub> H <sub>159</sub> B <sub>2</sub> Dy <sub>2</sub> N <sub>19</sub> O <sub>5</sub> | C <sub>180</sub> H <sub>154.5</sub> B <sub>2</sub> Dy <sub>2</sub> N <sub>17.5</sub> O <sub>5</sub> |
| Formula Mass                                                     | 3050.90                                                                                         | 2989.32                                                                                             |
| Temperature (K)                                                  | 180.0                                                                                           | 180.0                                                                                               |
| Crystal system                                                   | monoclinic                                                                                      | monoclinic                                                                                          |
| Space group                                                      | C2                                                                                              | C2                                                                                                  |
| <i>a</i> (Å)                                                     | 29.7238(10)                                                                                     | 29.7543(12)                                                                                         |
| <i>b</i> (Å)                                                     | 17.4037(6)                                                                                      | 17.3502(7)                                                                                          |
| <i>c</i> (Å)                                                     | 62.791(2)                                                                                       | 62.722(2)                                                                                           |
| $\alpha$ (°)                                                     | 90                                                                                              | 90                                                                                                  |
| $\beta$ (°)                                                      | 103.2170(10)                                                                                    | 103.1690(10)                                                                                        |
| $\gamma$ (°)                                                     | 90                                                                                              | 90                                                                                                  |
| Unit cell volume (Å <sup>3</sup> )                               | 31621.5(19)                                                                                     | 31528(2)                                                                                            |
| <i>Z</i>                                                         | 8                                                                                               | 8                                                                                                   |
| $\rho_{\text{calc}}$ (g/cm <sup>3</sup> )                        | 1.282                                                                                           | 1.260                                                                                               |
| $\mu$ / mm <sup>-1</sup>                                         | 1.001                                                                                           | 1.002                                                                                               |
| <i>F</i> (000)                                                   | 12576.0                                                                                         | 12312                                                                                               |
| Radiation                                                        | MoK $\alpha$ ( $\lambda$ = 0.71073)                                                             | MoK $\alpha$ ( $\lambda$ = 0.71073)                                                                 |
| Reflections collected                                            | 160554                                                                                          | 131144                                                                                              |
| Independent reflections                                          | 55747                                                                                           | 54639                                                                                               |
| <i>R</i> <sub>int</sub>                                          | 0.0496                                                                                          | 0.1338                                                                                              |
| GOF on <i>F</i> <sup>2</sup>                                     | 1.028                                                                                           | 1.001                                                                                               |
| <i>R</i> <sub>1</sub> ( <i>I</i> $\geq$ 2 $\sigma$ ( <i>I</i> )) | 0.0400                                                                                          | 0.1029                                                                                              |
| <i>wR</i> <sub>2</sub> (all data)                                | 0.0843                                                                                          | 0.3448                                                                                              |
| CCDC number                                                      | 2223655                                                                                         | 2223656                                                                                             |

**Table S2.** Selected bond distances (Å) for complexes **1** and **2**.

| <b>1</b> |          | <b>2</b> |           |
|----------|----------|----------|-----------|
| Dy1–O1   | 2.160(5) | Dy1–O1   | 2.232(17) |
| Dy1–O2   | 2.238(6) | Dy1–O2   | 2.202(18) |
| Dy1–O3   | 2.242(5) | Dy1–O3   | 2.207(16) |
| Dy2–O2   | 2.255(5) | Dy2–O2   | 2.299(17) |
| Dy2–O3   | 2.254(5) | Dy2–O3   | 2.247(17) |
| Dy2–O4   | 2.194(5) | Dy2–O4   | 2.138(18) |
| Dy3–O5   | 2.189(4) | Dy3–O5   | 2.187(16) |
| Dy3–O6   | 2.243(5) | Dy3–O6   | 2.281(16) |
| Dy3–O7   | 2.248(5) | Dy3–O7   | 2.249(16) |
| Dy4–O6   | 2.254(5) | Dy4–O6   | 2.209(16) |
| Dy4–O7   | 2.233(5) | Dy4–O7   | 2.231(17) |
| Dy4–O8   | 2.175(4) | Dy4–O8   | 2.205(16) |
| Dy1–N1   | 2.685(6) | Dy1–N1   | 2.70(2)   |
| Dy1–N2   | 2.648(6) | Dy1–N2   | 2.69(2)   |
| Dy1–N3   | 2.701(6) | Dy1–N3   | 2.71(2)   |
| Dy1–N4   | 2.696(6) | Dy1–N4   | 2.62(2)   |
| Dy1–N5   | 2.655(5) | Dy1–N5   | 2.71(2)   |
| Dy1–N6   | 2.688(6) | Dy1–N6   | 2.65(2)   |
| Dy2–N7   | 2.606(6) | Dy2–N7   | 2.64(2)   |
| Dy2–N8   | 2.681(5) | Dy2–N8   | 2.69(2)   |
| Dy2–N9   | 2.650(6) | Dy2–N9   | 2.61(2)   |
| Dy2–N10  | 2.588(6) | Dy2–N10  | 2.60(2)   |
| Dy2–N11  | 2.668(6) | Dy2–N11  | 2.67(2)   |
| Dy2–N12  | 2.616(5) | Dy2–N12  | 2.62(2)   |
| Dy3–N13  | 2.611(5) | Dy3–N13  | 2.58(2)   |
| Dy3–N14  | 2.613(6) | Dy3–N14  | 2.63(2)   |
| Dy3–N15  | 2.715(6) | Dy3–N15  | 2.71(2)   |
| Dy3–N16  | 2.662(6) | Dy3–N16  | 2.66(2)   |
| Dy3–N17  | 2.603(6) | Dy3–N17  | 2.59(2)   |
| Dy3–N18  | 2.658(5) | Dy3–N18  | 2.60(2)   |
| Dy4–N19  | 2.681(6) | Dy4–N19  | 2.70(2)   |
| Dy4–N20  | 2.699(6) | Dy4–N20  | 2.67(2)   |
| Dy4–N21  | 2.679(6) | Dy4–N21  | 2.63(2)   |
| Dy4–N22  | 2.678(6) | Dy4–N22  | 2.69(2)   |
| Dy4–N23  | 2.681(6) | Dy4–N23  | 2.62(2)   |
| Dy4–N24  | 2.641(6) | Dy4–N24  | 2.60(2)   |
| O2–O3    | 1.495(6) | O2–O3    | 1.46(2)   |
| O6–O7    | 1.494(6) | O6–O7    | 1.48(2)   |

**Table S3.** Selected bond angles (°) for complexes **1** and **2**.

| <b>1</b>    |            | <b>2</b>    |          |
|-------------|------------|-------------|----------|
| Dy1–O2–Dy2  | 141.3(2)   | Dy1–O2–Dy2  | 140.1(8) |
| Dy1–O3–Dy2  | 141.0(2)   | Dy1–O3–Dy2  | 143.6(9) |
| Dy3–O6–Dy4  | 140.5(2)   | Dy3–O6–Dy4  | 141.0(8) |
| Dy3–O7–Dy4  | 141.7(2)   | Dy3–O7–Dy4  | 141.7(8) |
| O1–Dy1–O2   | 161.09(18) | O1–Dy1–O2   | 160.6(6) |
| O1–Dy1–O3   | 159.45(18) | O1–Dy1–O3   | 160.6(7) |
| O4–Dy2–O2   | 162.47(18) | O4–Dy2–O2   | 162.5(7) |
| O4–Dy2–O3   | 158.79(18) | O4–Dy2–O3   | 160.0(6) |
| O5–Dy3–O6   | 158.34(17) | O5–Dy3–O6   | 158.4(6) |
| O5–Dy3–O7   | 162.89(17) | O5–Dy3–O7   | 163.2(6) |
| O8–Dy4–O6   | 160.89(18) | O8–Dy4–O6   | 160.1(6) |
| O8–Dy4–O7   | 159.82(17) | O8–Dy4–O7   | 159.6(6) |
| N1–Dy1–N2   | 60.15(18)  | N1–Dy1–N2   | 60.2(7)  |
| N2–Dy1–N3   | 60.40(18)  | N2–Dy1–N3   | 57.5(7)  |
| N3–Dy1–N4   | 60.20(17)  | N3–Dy1–N4   | 62.0(7)  |
| N4–Dy1–N5   | 60.46(17)  | N4–Dy1–N5   | 61.6(7)  |
| N5–Dy1–N6   | 60.42(18)  | N5–Dy1–N6   | 59.4(7)  |
| N6–Dy1–N1   | 60.58(18)  | N6–Dy1–N1   | 61.6(7)  |
| N7–Dy2–N8   | 60.42(17)  | N7–Dy2–N8   | 60.7(7)  |
| N8–Dy2–N9   | 60.65(18)  | N8–Dy2–N9   | 59.5(7)  |
| N9–Dy2–N10  | 60.54(18)  | N9–Dy2–N10  | 61.2(7)  |
| N10–Dy2–N11 | 60.94(18)  | N10–Dy2–N11 | 60.6(7)  |
| N11–Dy2–N12 | 60.71(18)  | N11–Dy2–N12 | 60.9(7)  |
| N12–Dy2–N7  | 61.53(18)  | N12–Dy2–N7  | 62.2(7)  |
| N13–Dy3–N14 | 61.37(18)  | N13–Dy3–N14 | 61.3(7)  |
| N14–Dy3–N15 | 60.50(18)  | N14–Dy3–N15 | 58.3(7)  |
| N15–Dy3–N16 | 59.33(17)  | N15–Dy3–N16 | 60.9(7)  |
| N16–Dy3–N17 | 61.32(17)  | N16–Dy3–N17 | 62.0(6)  |
| N17–Dy3–N18 | 60.77(18)  | N17–Dy3–N18 | 61.6(7)  |
| N18–Dy3–N13 | 61.26(17)  | N18–Dy3–N13 | 60.3(7)  |
| N19–Dy4–N20 | 60.33(19)  | N19–Dy4–N20 | 61.8(7)  |
| N20–Dy4–N21 | 60.07(18)  | N20–Dy4–N21 | 58.9(7)  |
| N21–Dy4–N22 | 60.19(18)  | N21–Dy4–N22 | 60.3(6)  |
| N22–Dy4–N23 | 60.81(18)  | N22–Dy4–N23 | 62.0(7)  |
| N23–Dy4–N24 | 60.71(17)  | N23–Dy4–N24 | 61.0(7)  |
| N24–Dy4–N19 | 60.13(18)  | N24–Dy4–N19 | 58.3(7)  |

**Table S4.** Crystal Data and Structure Refinement for **3** and **4**.

| <b>Compound reference</b>                                        | <b>3</b>                                                                                                        | <b>4</b>                                                                                                        |
|------------------------------------------------------------------|-----------------------------------------------------------------------------------------------------------------|-----------------------------------------------------------------------------------------------------------------|
| Chemical formula                                                 | C <sub>144</sub> H <sub>126</sub> B <sub>2</sub> Cl <sub>2</sub> Dy <sub>2</sub> N <sub>18</sub> O <sub>2</sub> | C <sub>144</sub> H <sub>126</sub> B <sub>2</sub> Cl <sub>2</sub> Dy <sub>2</sub> N <sub>18</sub> O <sub>2</sub> |
| Formula Mass                                                     | 2558.14                                                                                                         | 2558.14                                                                                                         |
| Temperature (K)                                                  | 180.0                                                                                                           | 180.0                                                                                                           |
| Crystal system                                                   | orthorhombic                                                                                                    | orthorhombic                                                                                                    |
| Space group                                                      | <i>P</i> 2 <sub>1</sub> 2 <sub>1</sub> 2 <sub>1</sub>                                                           | <i>P</i> 2 <sub>1</sub> 2 <sub>1</sub> 2 <sub>1</sub>                                                           |
| <i>a</i> (Å)                                                     | 15.7298(3)                                                                                                      | 15.7450(3)                                                                                                      |
| <i>b</i> (Å)                                                     | 16.3326(4)                                                                                                      | 16.3240(4)                                                                                                      |
| <i>c</i> (Å)                                                     | 47.7251(10)                                                                                                     | 47.7781(12)                                                                                                     |
| $\alpha$ (°)                                                     | 90                                                                                                              | 90                                                                                                              |
| $\beta$ (°)                                                      | 90                                                                                                              | 90                                                                                                              |
| $\gamma$ (°)                                                     | 90                                                                                                              | 90                                                                                                              |
| Unit cell volume (Å <sup>3</sup> )                               | 12261.0(5)                                                                                                      | 12280.0(5)                                                                                                      |
| <i>Z</i>                                                         | 4                                                                                                               | 4                                                                                                               |
| $\rho_{\text{calc}}$ (g/cm <sup>3</sup> )                        | 1.386                                                                                                           | 1.384                                                                                                           |
| $\mu$ / mm <sup>-1</sup>                                         | 1.315                                                                                                           | 1.313                                                                                                           |
| <i>F</i> (000)                                                   | 5232.0                                                                                                          | 5232.0                                                                                                          |
| Radiation                                                        | MoK $\alpha$ ( $\lambda$ = 0.71073)                                                                             | MoK $\alpha$ ( $\lambda$ = 0.71073)                                                                             |
| Reflections collected                                            | 90517                                                                                                           | 83424                                                                                                           |
| Independent reflections                                          | 21667                                                                                                           | 21647                                                                                                           |
| <i>R</i> <sub>int</sub>                                          | 0.0681                                                                                                          | 0.0503                                                                                                          |
| GOF on <i>F</i> <sup>2</sup>                                     | 1.061                                                                                                           | 1.032                                                                                                           |
| <i>R</i> <sub>1</sub> ( <i>I</i> $\geq$ 2 $\sigma$ ( <i>I</i> )) | 0.0474                                                                                                          | 0.0438                                                                                                          |
| <i>wR</i> <sub>2</sub> (all data)                                | 0.1321                                                                                                          | 0.1149                                                                                                          |
| <i>CCDC number</i>                                               | 2228952                                                                                                         | 2228983                                                                                                         |

**Table S5.** Selected bond distances (Å) for complexes **3** and **4**.

| <b>3</b> |          | <b>4</b> |          |
|----------|----------|----------|----------|
| Dy1-Cl1  | 2.663(3) | Dy1-Cl1  | 2.639(2) |
| Dy2-Cl2  | 2.640(3) | Dy2-Cl2  | 2.669(3) |
| Dy1-O1   | 2.274(6) | Dy1-O1   | 2.265(5) |
| Dy1-O2   | 2.236(7) | Dy1-O2   | 2.263(6) |
| Dy2-O1   | 2.255(6) | Dy2-O1   | 2.258(5) |
| Dy2-O2   | 2.255(7) | Dy2-O2   | 2.237(6) |
| Dy1-N1   | 2.648(7) | Dy1-N1   | 2.635(7) |
| Dy1-N2   | 2.664(9) | Dy1-N2   | 2.639(6) |
| Dy1-N3   | 2.640(9) | Dy1-N3   | 2.629(7) |
| Dy1-N4   | 2.621(8) | Dy1-N4   | 2.627(6) |
| Dy1-N5   | 2.633(8) | Dy1-N5   | 2.680(7) |
| Dy1-N6   | 2.620(8) | Dy1-N6   | 2.644(7) |
| Dy2-N7   | 2.621(7) | Dy2-N7   | 2.638(7) |
| Dy2-N8   | 2.637(8) | Dy2-N8   | 2.668(8) |
| Dy2-N9   | 2.629(7) | Dy2-N9   | 2.642(7) |
| Dy2-N10  | 2.648(7) | Dy2-N10  | 2.631(7) |
| Dy2-N11  | 2.684(8) | Dy2-N11  | 2.630(7) |
| Dy2-N12  | 2.624(7) | Dy2-N12  | 2.598(7) |
| O1-O2    | 1.546(9) | O1-O2    | 1.532(8) |

**Table S6.** Selected bond angles (°) for complexes **3** and **4**.

| <b>3</b>    |            | <b>4</b>    |            |
|-------------|------------|-------------|------------|
| Dy1-O1-Dy2  | 138.5(3)   | Dy1-O1-Dy2  | 139.5(3)   |
| Dy1-O2-Dy2  | 141.2(3)   | Dy1-O2-Dy2  | 141.1(3)   |
| Cl1-Dy1-O1  | 158.09(18) | Cl1-Dy1-O1  | 161.89(15) |
| Cl1-Dy1-O2  | 161.55(19) | Cl1-Dy1-O2  | 158.34(16) |
| Cl2-Dy2-O1  | 161.58(18) | Cl2-Dy2-O1  | 158.76(16) |
| Cl2-Dy2-O2  | 158.22(18) | Cl2-Dy2-O2  | 161.22(16) |
| N1-Dy1-N2   | 59.8(3)    | N1-Dy1-N2   | 60.5(2)    |
| N2-Dy1-N3   | 60.1(3)    | N2-Dy1-N3   | 61.1(2)    |
| N3-Dy1-N4   | 60.8(3)    | N3-Dy1-N4   | 60.6(2)    |
| N4-Dy1-N5   | 61.0(3)    | N4-Dy1-N5   | 60.4(2)    |
| N5-Dy1-N6   | 60.9(3)    | N5-Dy1-N6   | 61.1(2)    |
| N6-Dy1-N1   | 60.5(2)    | N6-Dy1-N1   | 60.7(2)    |
| N7-Dy2-N8   | 60.7(2)    | N7-Dy2-N8   | 60.1(2)    |
| N8-Dy2-N9   | 60.9(2)    | N8-Dy2-N9   | 59.9(2)    |
| N9-Dy2-N10  | 60.7(2)    | N9-Dy2-N10  | 60.5(2)    |
| N10-Dy2-N11 | 61.0(3)    | N10-Dy2-N11 | 61.1(2)    |
| N11-Dy2-N12 | 59.7(2)    | N11-Dy2-N12 | 60.8(2)    |
| N12-Dy2-N7  | 61.2(2)    | N12-Dy2-N7  | 61.3(2)    |

**Table S7.** The CShM values calculated by SHAPE 2.1 for **1**. The lowest CShM value is highlighted.<sup>1, 2</sup>

| Coordination Geometry                           | <b>1</b>     |              |              |              |
|-------------------------------------------------|--------------|--------------|--------------|--------------|
|                                                 | <b>Dy1</b>   | <b>Dy2</b>   | <b>Dy3</b>   | <b>Dy4</b>   |
| Enneagon ( $D_{9h}$ )                           | 34.610       | 34.479       | 34.793       | 34.124       |
| Octagonal pyramid ( $C_{8v}$ )                  | 24.929       | 25.686       | 25.854       | 25.055       |
| Heptagonal bipyramid ( $D_{7h}$ )               | 16.177       | 16.711       | 16.482       | 15.788       |
| Johnson triangular cupola J3 ( $C_{3v}$ )       | 15.214       | 14.420       | 14.222       | 15.263       |
| Capped cube J8 ( $C_{4v}$ )                     | 8.314        | 6.681        | 6.650        | 8.333        |
| Spherical-relaxed capped cube ( $C_{4v}$ )      | 7.227        | 5.538        | 5.512        | 7.182        |
| Capped square antiprism J10 ( $C_{4v}$ )        | 12.003       | 12.542       | 12.640       | 11.889       |
| Spherical capped square antiprism ( $C_{4v}$ )  | 11.855       | 12.423       | 12.473       | 11.825       |
| Tricapped trigonal prism J51 ( $D_{3h}$ )       | 11.237       | 11.989       | 12.071       | 11.168       |
| Spherical tricapped trigonal prism ( $D_{3h}$ ) | 12.286       | 12.763       | 12.803       | 12.309       |
| Tridiminished icosahedron J63 ( $C_{3v}$ )      | 9.664        | 11.117       | 11.006       | 9.832        |
| Hula-hoop ( $C_{2v}$ )                          | <b>1.923</b> | <b>2.262</b> | <b>2.243</b> | <b>1.900</b> |
| Muffin ( $C_s$ )                                | 10.057       | 10.439       | 10.516       | 10.020       |

**Table S8.** The CShM values calculated by SHAPE 2.1 for **2**. The lowest CShM value is highlighted.<sup>1, 2</sup>

| Coordination Geometry                           | <b>2</b>     |              |              |              |
|-------------------------------------------------|--------------|--------------|--------------|--------------|
|                                                 | <b>Dy1</b>   | <b>Dy2</b>   | <b>Dy3</b>   | <b>Dy4</b>   |
| Enneagon ( $D_{9h}$ )                           | 34.792       | 34.660       | 35.174       | 34.042       |
| Octagonal pyramid ( $C_{8v}$ )                  | 24.587       | 25.496       | 25.595       | 24.869       |
| Heptagonal bipyramid ( $D_{7h}$ )               | 15.765       | 16.690       | 16.789       | 15.563       |
| Johnson triangular cupola J3 ( $C_{3v}$ )       | 15.070       | 13.965       | 13.941       | 15.227       |
| Capped cube J8 ( $C_{4v}$ )                     | 8.233        | 6.819        | 6.920        | 8.019        |
| Spherical-relaxed capped cube ( $C_{4v}$ )      | 7.177        | 5.579        | 5.745        | 6.887        |
| Capped square antiprism J10 ( $C_{4v}$ )        | 11.726       | 12.915       | 12.637       | 11.709       |
| Spherical capped square antiprism ( $C_{4v}$ )  | 11.711       | 12.782       | 12.560       | 11.558       |
| Tricapped trigonal prism J51 ( $D_{3h}$ )       | 11.315       | 12.267       | 12.101       | 11.061       |
| Spherical tricapped trigonal prism ( $D_{3h}$ ) | 12.259       | 13.049       | 12.816       | 12.128       |
| Tridiminished icosahedron J63 ( $C_{3v}$ )      | 9.847        | 11.148       | 10.844       | 10.013       |
| Hula-hoop ( $C_{2v}$ )                          | <b>1.977</b> | <b>2.477</b> | <b>2.220</b> | <b>1.965</b> |
| Muffin ( $C_s$ )                                | 9.936        | 10.725       | 10.765       | 9.691        |

**Table S9.** The CShM values calculated by SHAPE 2.1 for **3** and **4**. The lowest CShM value is highlighted.<sup>1, 2</sup>

| Coordination Geometry                           | <b>3</b>     |              | <b>4</b>     |              |
|-------------------------------------------------|--------------|--------------|--------------|--------------|
|                                                 | <b>Dy1</b>   | <b>Dy2</b>   | <b>Dy1</b>   | <b>Dy2</b>   |
| Enneagon ( $D_{9h}$ )                           | 35.339       | 35.403       | 35.581       | 35.420       |
| Octagonal pyramid ( $C_{8v}$ )                  | 25.485       | 25.621       | 25.534       | 25.521       |
| Heptagonal bipyramid ( $D_{7h}$ )               | 16.507       | 16.093       | 16.097       | 16.629       |
| Johnson triangular cupola J3 ( $C_{3v}$ )       | 13.649       | 14.433       | 14.314       | 13.788       |
| Capped cube J8 ( $C_{4v}$ )                     | 8.692        | 9.078        | 9.166        | 8.653        |
| Spherical-relaxed capped cube ( $C_{4v}$ )      | 7.157        | 7.536        | 7.598        | 7.118        |
| Capped square antiprism J10 ( $C_{4v}$ )        | 10.559       | 9.519        | 9.560        | 10.443       |
| Spherical capped square antiprism ( $C_{4v}$ )  | 10.113       | 9.135        | 9.186        | 10.013       |
| Tricapped trigonal prism J51 ( $D_{3h}$ )       | 10.520       | 9.735        | 9.814        | 10.474       |
| Spherical tricapped trigonal prism ( $D_{3h}$ ) | 10.299       | 9.436        | 9.493        | 10.245       |
| Tridiminshed icosahedron J63 ( $C_{3v}$ )       | 7.481        | 8.793        | 8.698        | 7.547        |
| Hula-hoop ( $C_{2v}$ )                          | <b>2.516</b> | <b>2.598</b> | <b>2.642</b> | <b>2.593</b> |
| Muffin ( $C_s$ )                                | 8.019        | 7.381        | 7.389        | 7.931        |

**Table S10.** Structural and magnetic parameters for dinuclear hexaazamacrocyclic SMMs.

| Complex                             | <b>1</b>             | <b>Dy<sub>2</sub>-OH-Me</b> | <b>Dy<sub>2</sub>-OH-SMe</b> | <b>Dy<sub>2</sub>-F</b> |
|-------------------------------------|----------------------|-----------------------------|------------------------------|-------------------------|
| Dy-O/F <sub>outer</sub> (Å)         | 2.179                | 2.144                       | 2.170                        | 2.184                   |
| Dy-O/F <sub>inner</sub> (Å)         | 2.246                | 2.288                       | 2.285                        | 2.267                   |
| Dy-N <sub>equatorial</sub> (Å)      | 2.658                | 2.665                       | 2.672                        | 2.654                   |
| Dy-Dy <sub>intramolecular</sub> (Å) | 4.236                | 3.828                       | 3.822                        | 3.808                   |
| $U_{\text{eff}}$ (K)                | 60(3)                | 230(19)                     | 141(6)                       | 39(3)                   |
| C                                   | $1.4 \times 10^{-2}$ | 2.9                         | 8.94                         | 2.3                     |
| n                                   | 3.7                  | 2.47                        | 2.38                         | 2.1                     |
| Hysteresis loop (1.9 K)             | Yes                  | No                          | No                           | No                      |
| Ref.                                | This work            | [3]                         | [4]                          | [5]                     |

Note: All bond distances refer to the average values.



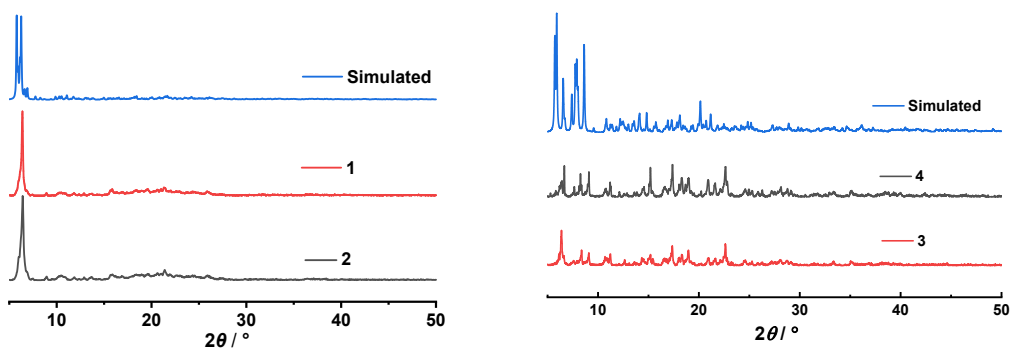

**Fig. S1** Powder XRD analyses of complexes **1-4**. The blue lines are simulated data from single crystal data.

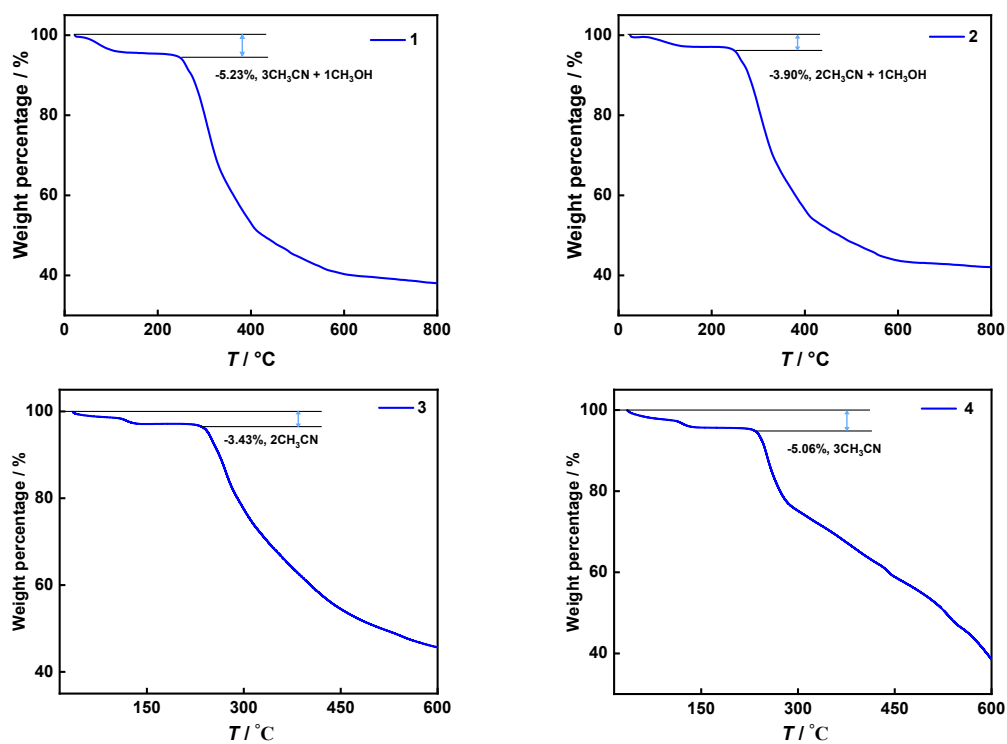

**Fig. S2** Thermogravimetric analysis of complexes **1-4**.

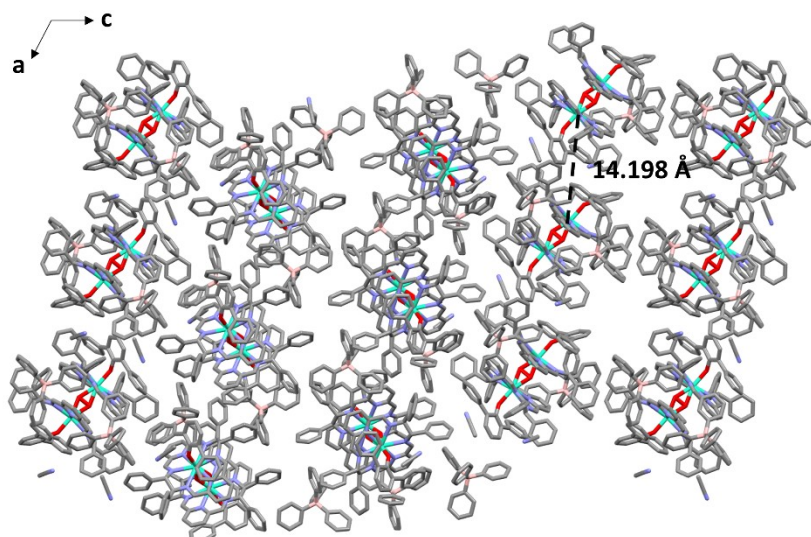

**Fig. S3** The packing diagram for **1** shown along the crystallographic *b* axis gives the shortest intermolecular Dy...Dy distance of 14.198 Å. The hydrogen atoms are omitted for clarity.

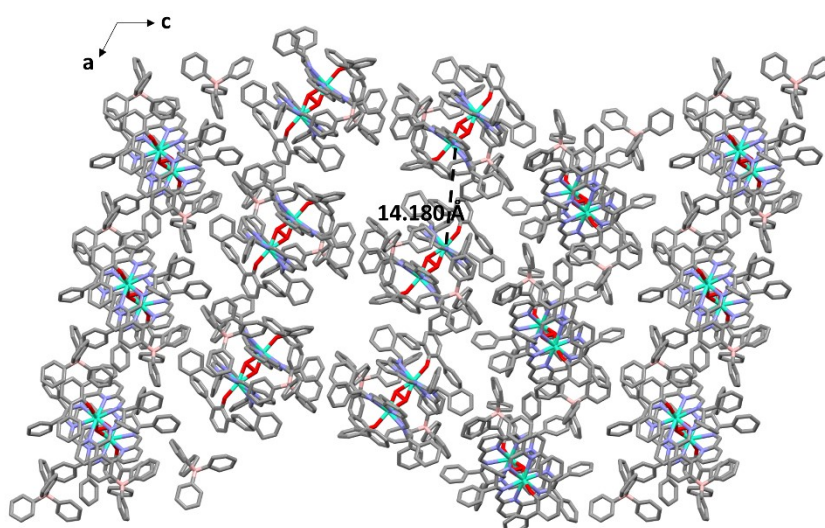

**Fig. S4** The packing diagram for **2** shown along the crystallographic *b* axis gives the shortest intermolecular Dy...Dy distance of 14.180 Å. The hydrogen atoms are omitted for clarity.

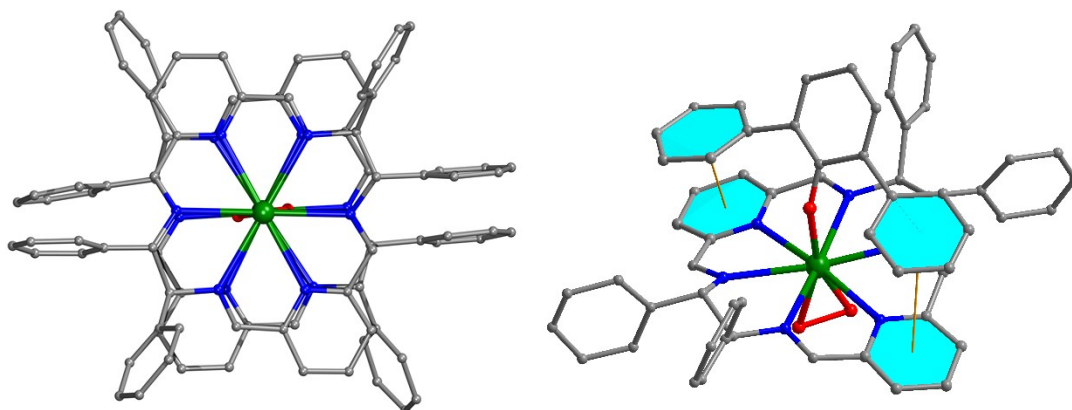

**Fig. S5** Crystal structure of **1** (left). Hydrogen atoms, solvents, counter ions and axial ligands are omitted for clarity. The  $\pi$ - $\pi$  stacking interaction between the equatorial pyridine ring and one axial benzene unit in **1** (right).

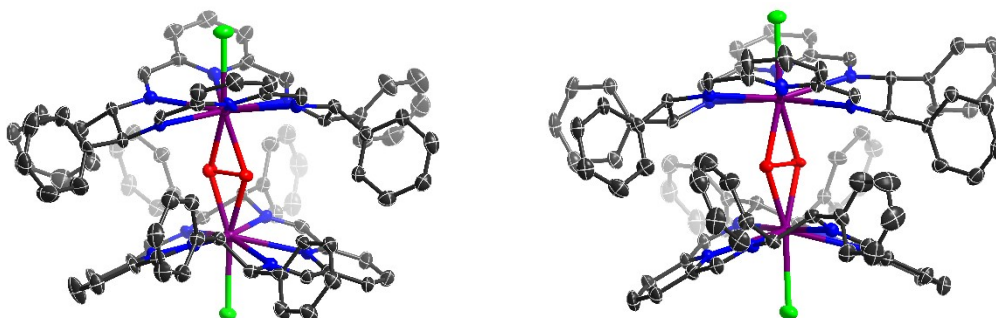

**Fig. S6** Crystal structures of **3** (left) and **4** (right). Hydrogen atoms, solvents and counter ions are omitted for clarity. Displacement ellipsoids set at the 30% probability level. Color code: Dy, violet; O, red; N, blue; C, gray.

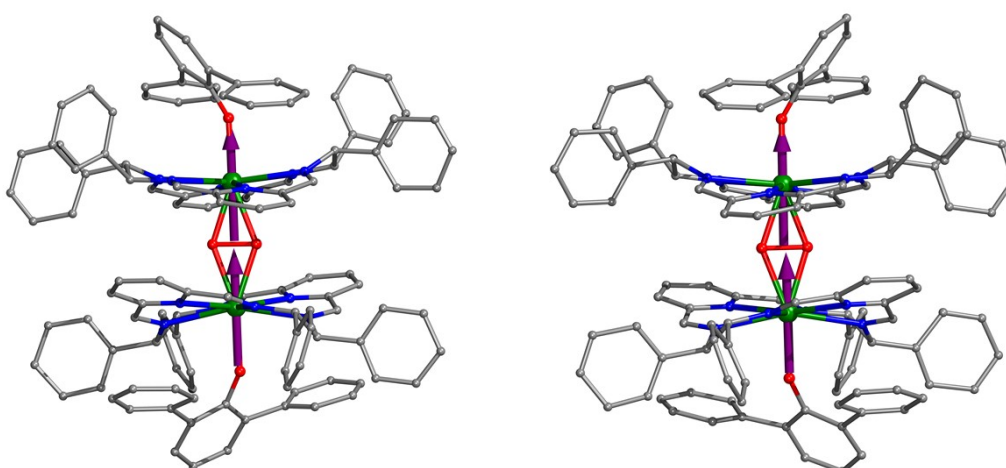

**Fig S7** Ground-state magnetic anisotropy of complex **1-Dy1Dy2** (left) and **2-Dy1Dy2** (right). The violet lines represent the orientation of the anisotropy axis for Dy ions.<sup>6</sup>

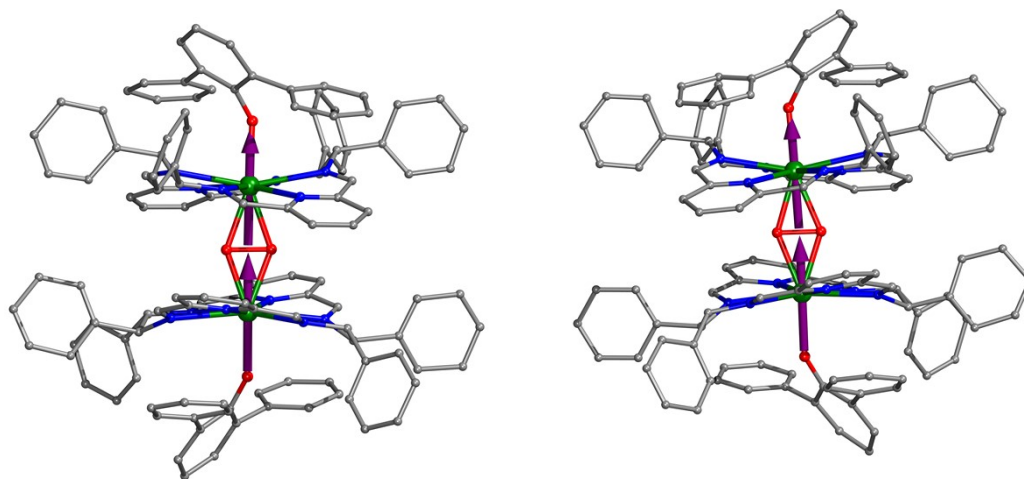

**Fig S8** Ground-state magnetic anisotropy of complex **1-Dy<sub>3</sub>Dy<sub>4</sub>** (left) and **2-Dy<sub>3</sub>Dy<sub>4</sub>** (right). The violet lines represent the orientation of the anisotropy axis for Dy ions.<sup>6</sup>

### Magnetic measurements

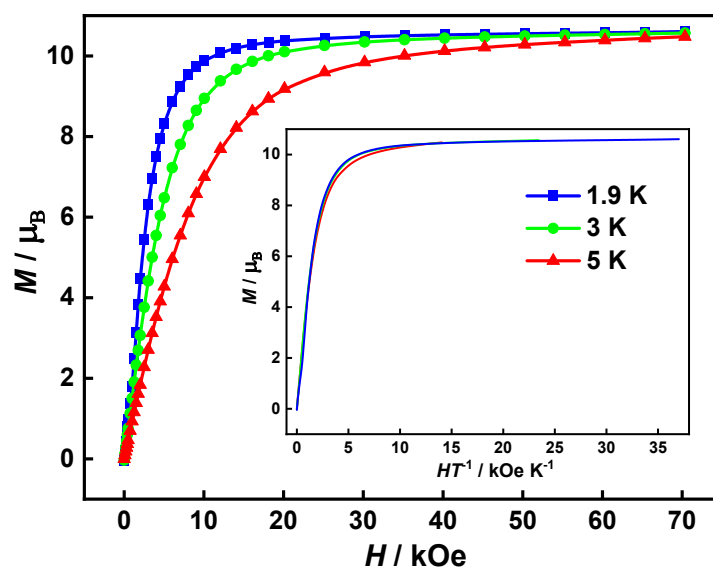

**Fig. S9** Field dependence of magnetization between 0 and 70 kOe and at temperatures of 1.9, 3.0, and 5.0 K for **1**. Inset:  $M$  vs.  $H/T$  plots for **1** at indicated temperatures.

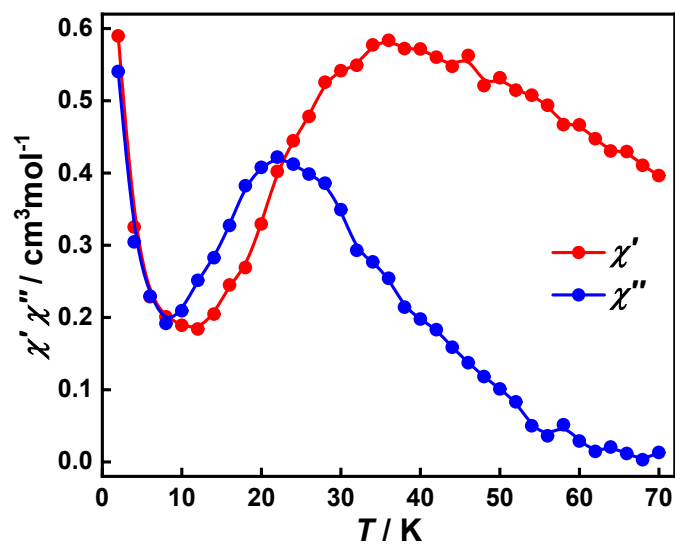

**Fig. S10** Temperature dependence of in-phase ( $\chi'$ ) and out-of-phase susceptibility ( $\chi''$ ) for **1** under zero dc field at 997 Hz.

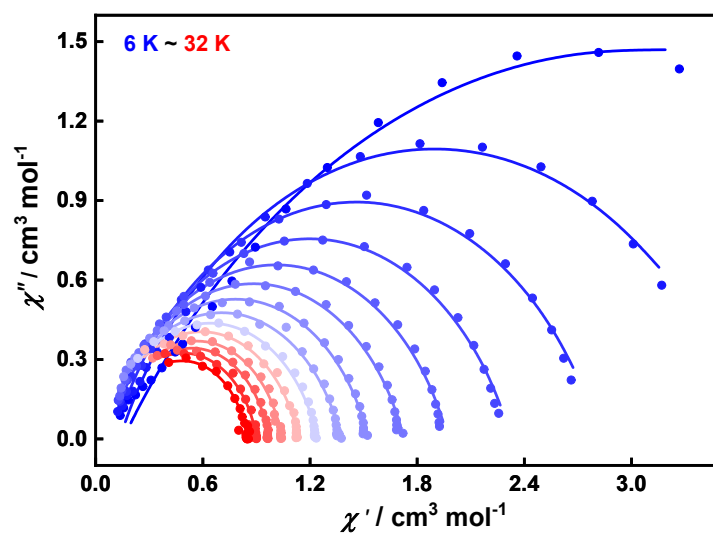

**Fig. S11** Cole-Cole plots for **1**. The solid lines are obtained by fitting experimental data to generalized Debye model.

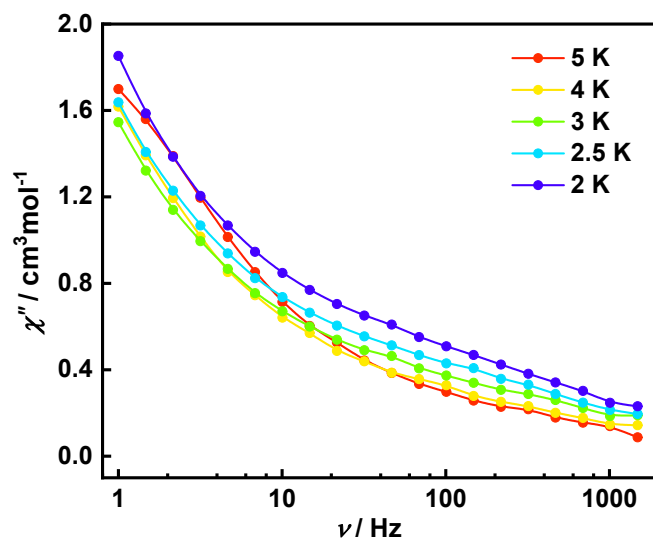

**Fig. S12** Frequency dependence of the out-of-phase susceptibility ( $\chi''$ ) for **1** under zero dc field in the temperature range of 2-5 K. Solid lines are a guide to the eye.

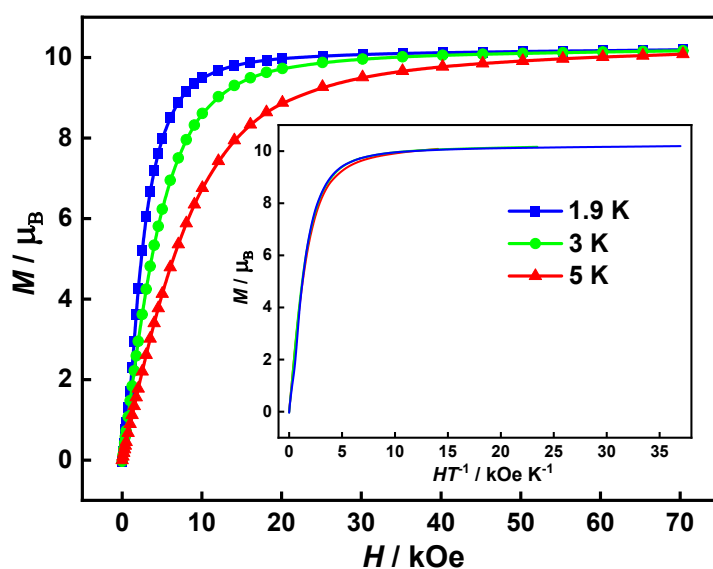

**Fig. S13** Field dependence of magnetization between 0 and 70 kOe and at temperatures of 1.9, 3.0, and 5.0 K for **2**. Inset:  $M$  vs.  $H/T$  plots for **2** at indicated temperatures.

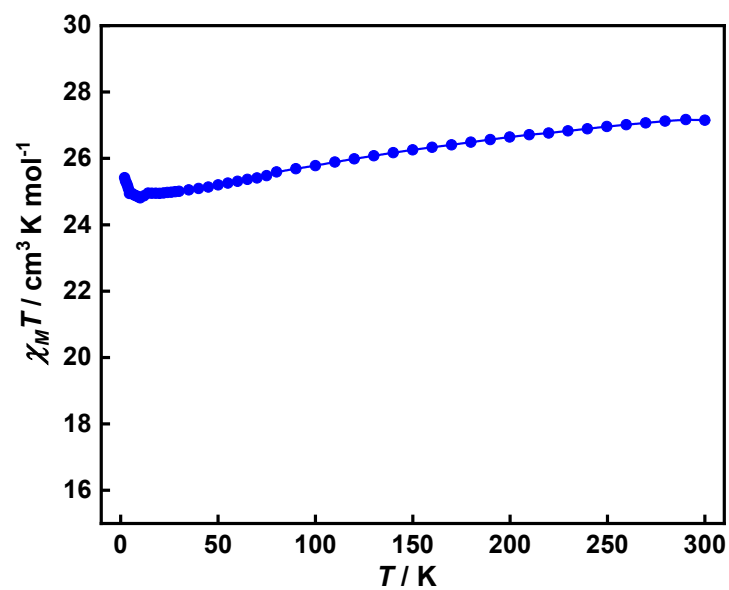

**Fig. S14** Temperature dependence of  $\chi_M T$  products at 1000 Oe measured for **2**.

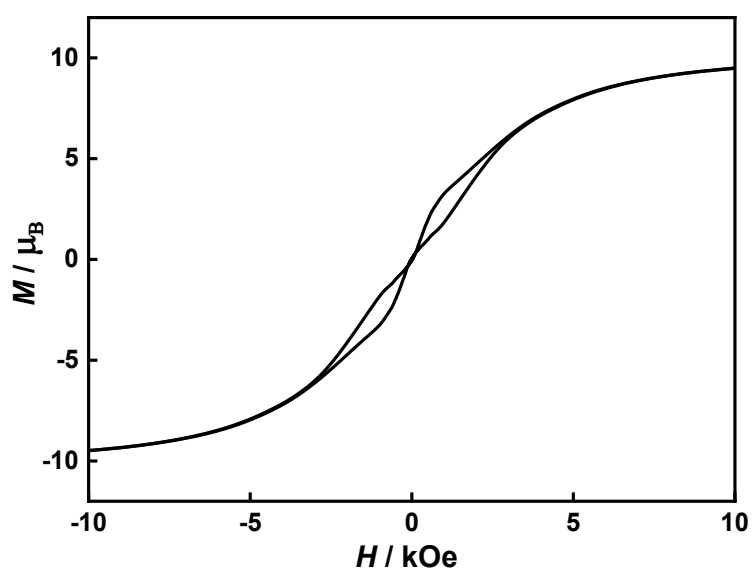

**Fig. S15** Magnetic hysteresis loop for **2**. The data were collected at 1.9 K using an average field sweep speed of  $18 \text{ Oe s}^{-1}$ .

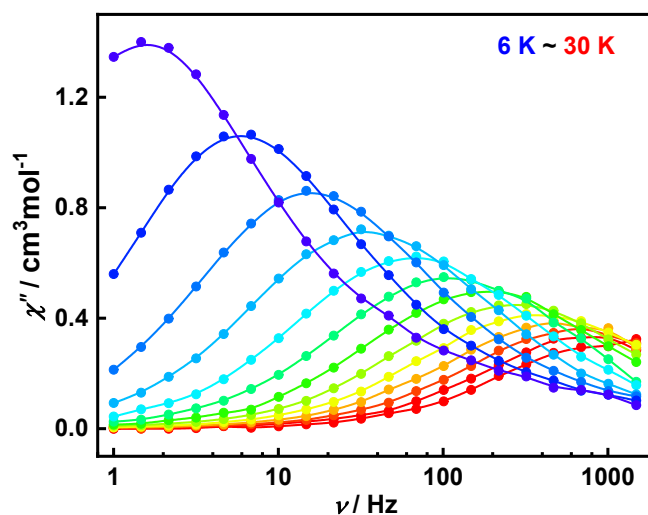

**Fig. S16** Frequency dependence of the out-of-phase susceptibility ( $\chi''$ ) for **2** under a zero dc field at ac frequencies of 1-1488 Hz in the temperature range of 6 to 30 K (2 K interval). Solid lines are a guide to the eye.

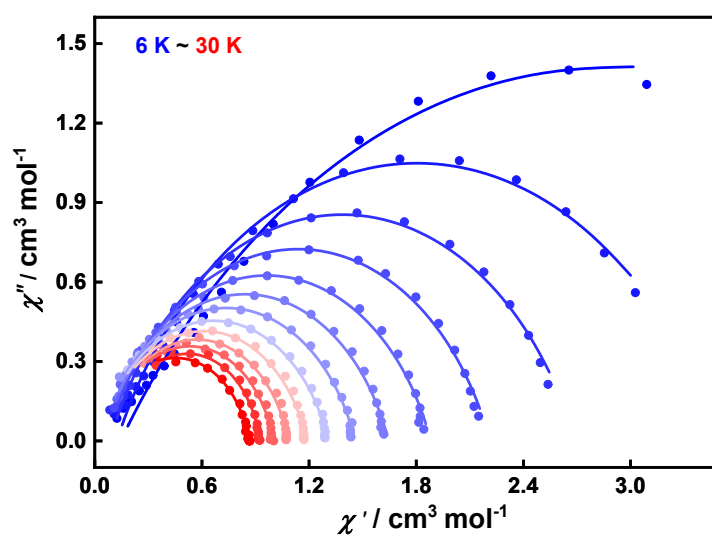

**Fig. S17** Cole-Cole plots for **2**. The solid lines are obtained by fitting experimental data to generalized Debye model.



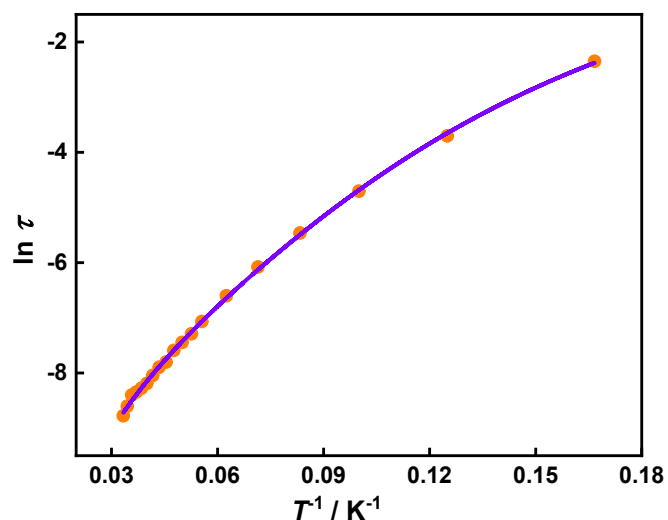

**Fig. S18** Temperature dependence of the relaxation time in the form of natural logarithm for **2** under zero dc field. The solid line represents the best fit. The fitting equation is  $\ln(\tau) = -\ln[CT^n + \tau_0^{-1}\exp(-U_{\text{eff}}/k_B T)]$ , giving  $U_{\text{eff}}/k_B = 59(3)$  K,  $\tau_0 = 6.4 \times 10^{-5}$  s,  $C = 1.3 \times 10^{-2} \text{ s}^{-1}\text{K}^{-n}$  and  $n = 3.7$  (adjusted  $R^2 = 0.9993$ ).

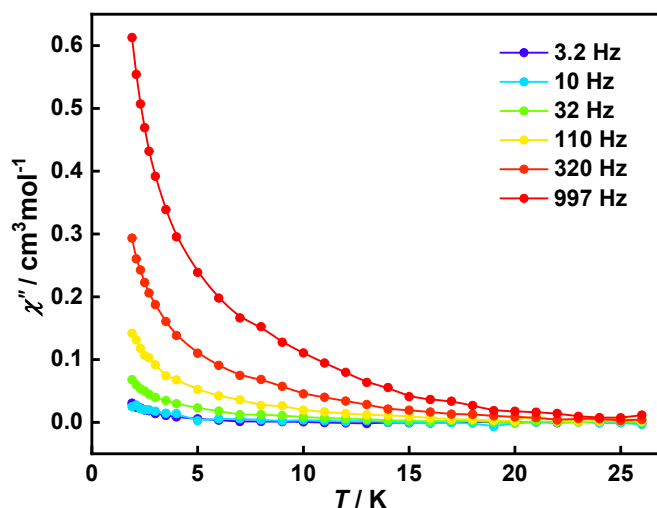

**Fig. S19** Temperature dependence of out-of-phase susceptibility ( $\chi''$ ) for **3** under zero dc field. Solid lines are a guide to the eye.

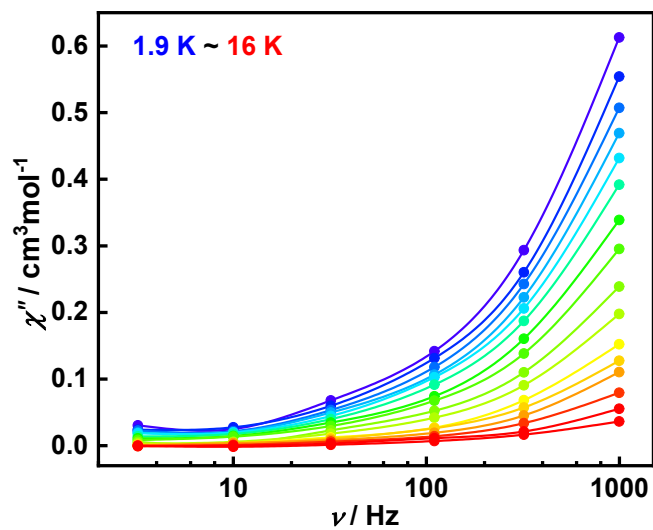

**Fig. S20** Frequency dependence of out-of-phase susceptibility ( $\chi''$ ) for **3** under zero dc field. Solid lines are a guide to the eye.

## References

1. D. Casanova, J. Cirera, M. Llunell, P. Alemany, D. Avnir and S. Alvarez, *J. Am. Chem. Soc.*, 2004, **126**, 1755-1763.
2. M. Pinsky and D. Avnir, *Inorg. Chem.*, 1998, **37**, 5575-5582.
3. C. Zhao, Z. Zhu, X.-L. Li and J. Tang, *Inorg. Chem. Front.*, 2022, **9**, 4049-4055.
4. Z. Zhu, C. Zhao, Q. Zhou, S. Liu, X.-L. Li, A. Mansikkamäki and J. Tang, *CCS Chem.*, 2022, **4**, 3762-3771.
5. X. Liu, C. Zhao, J. Wu, Z. Zhu and J. Tang, *Dalton Trans.*, 2022, **51**, 16444-16447.
6. N. F. Chilton, D. Collison, E. J. L. McInnes, R. E. P. Winpenny and A. Soncini, *Nat. Commun.*, 2013, **4**, 2551.
